# Supplementary material
Source: MDPI journal article supplement (https://www.mdpi.com/2674-0710/3/1/2)
Supplement: s1 [file s1]

# The enhanced activity of a plant mixture from the Brazilian Caatinga biome against venereal trichomonads confirms the traditional use

Nícolas Luiz Feijó Silva<sup>1</sup>, Patrícia de Brum Vieira<sup>2</sup>, Márcia Vanusa da Silva<sup>3,4</sup>, Alexandre José Macedo<sup>1,4,\*</sup> and Tiana Tasca<sup>1,4,\*</sup>

<sup>1</sup> Faculdade de Farmácia e Centro de Biotecnologia, Universidade Federal do Rio Grande do Sul, Porto Alegre, RS 90610-000, Brazil. nicolasfsilva@gmail.com (N.L.F.S.), alexandre.macedo@ufrgs.br (A.J.M.), tiana.tasca@ufrgs.br (T.T).

<sup>2</sup> Grupo de Pesquisa Estresse Oxidativo e Sinalização Celular, Centro Interdisciplinar de Pesquisa em Biotecnologia – CIPBIOTEC, Universidade Federal do Pampa, São Gabriel, RS 97300-000, Brazil. patriciasbrum@yahoo.com.br

<sup>3</sup> Centro de Ciências Biológicas e Departamento de Bioquímica, Universidade Federal de Pernambuco, Recife, PE 50670-901, Brazil. marcia.vanusa@ufpe.br

<sup>4</sup> Instituto Nacional do Semi-Árido (INSA), Núcleo de Bioprospecção da Caatinga (NBioCaat), Campina Grande, PE, Brazil. marcia.vanusa@ufpe.br (MVS), alexandre.macedo@ufrgs.br (A.J.M.), tiana.tasca@ufrgs.br (T.T).

\* Correspondence: alexandre.macedo@ufrgs.br (A.J.M.), tiana.tasca@ufrgs.br (T.T).

## Supplementary Material

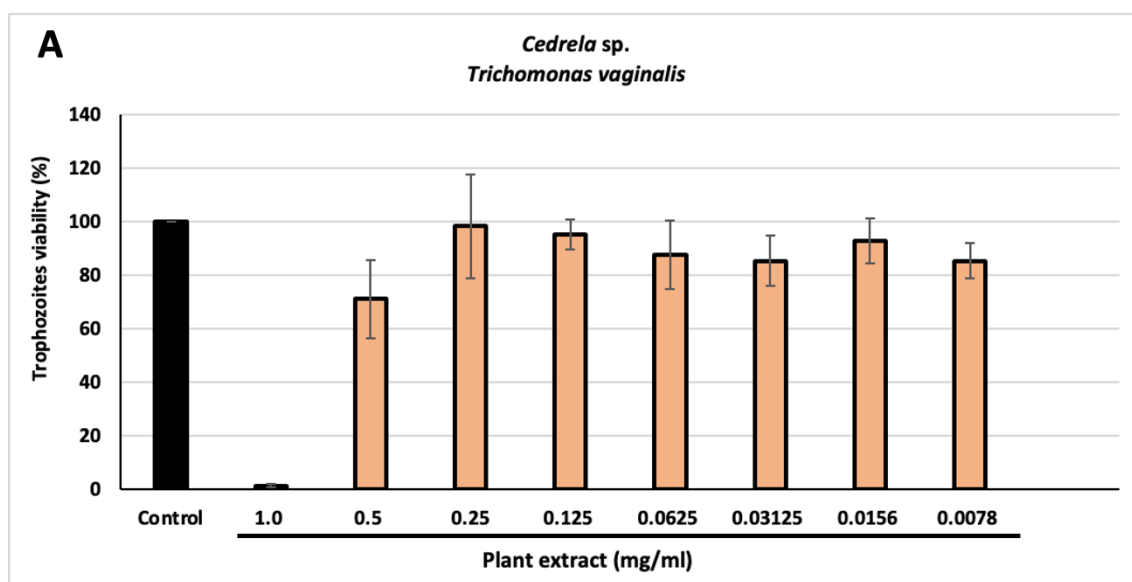

**B**

*Cedrela* sp.  
*Tritrichomonas foetus*

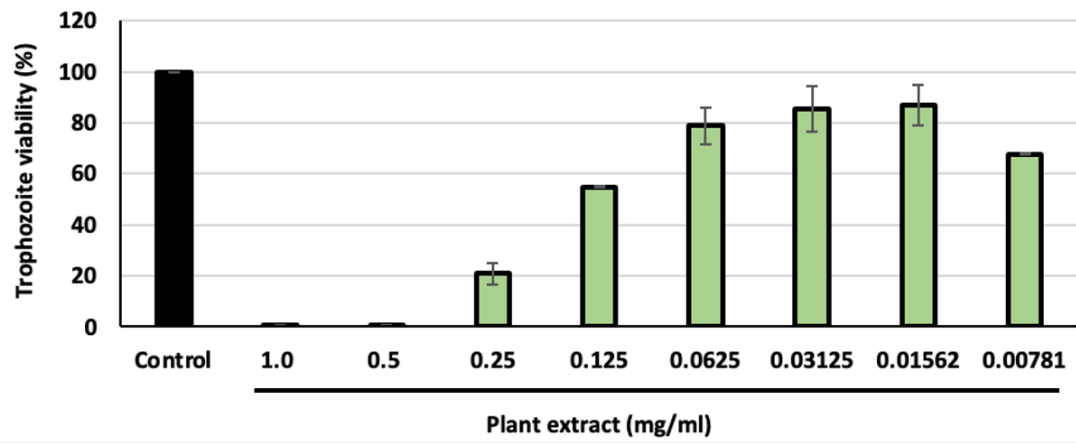**C**

*Cedrela* sp.

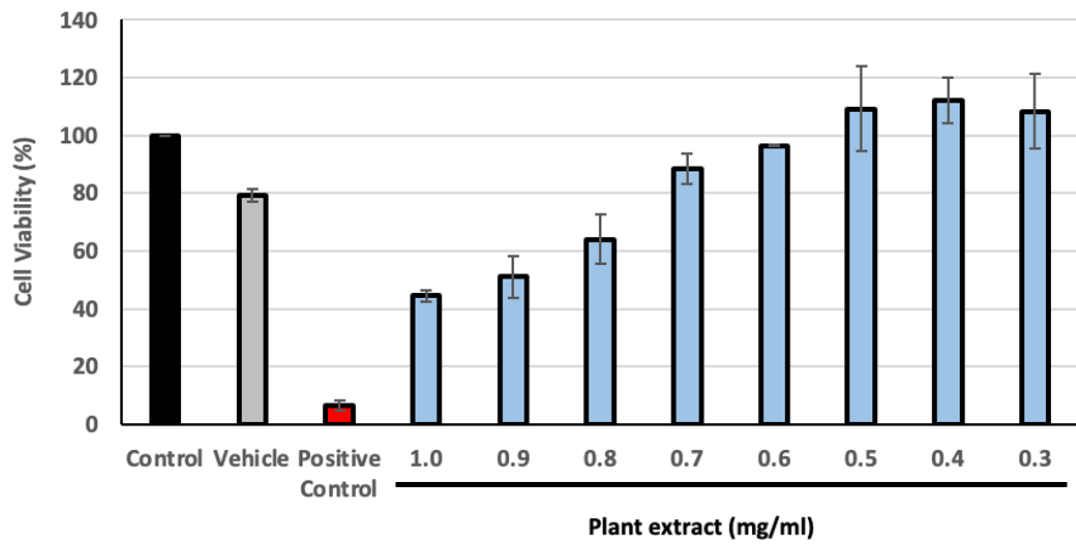

**D***Commiphora leptophloeos*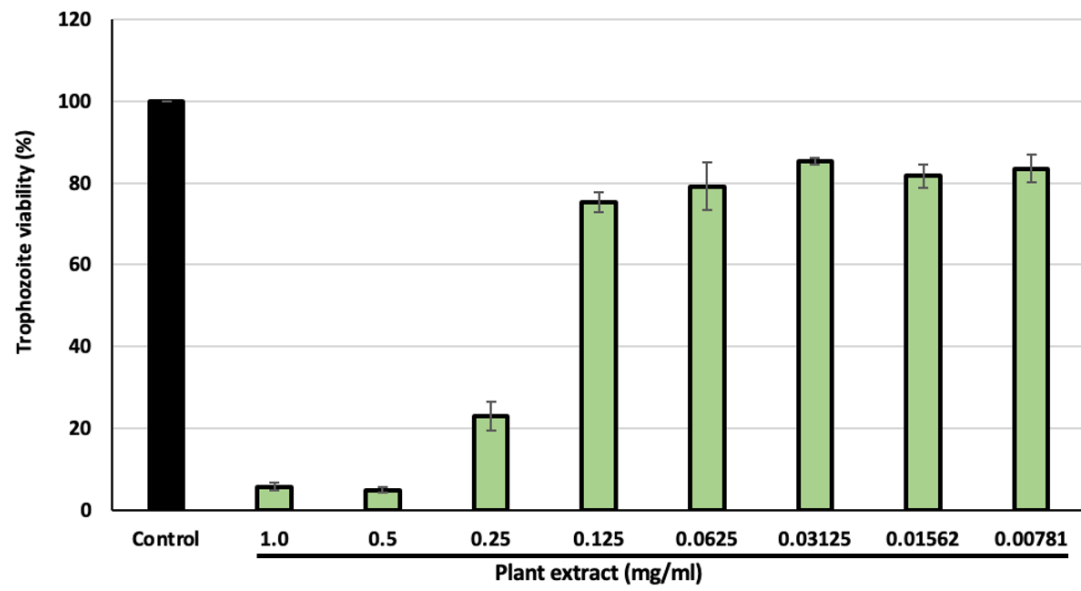**E***Commiphora leptophloeos*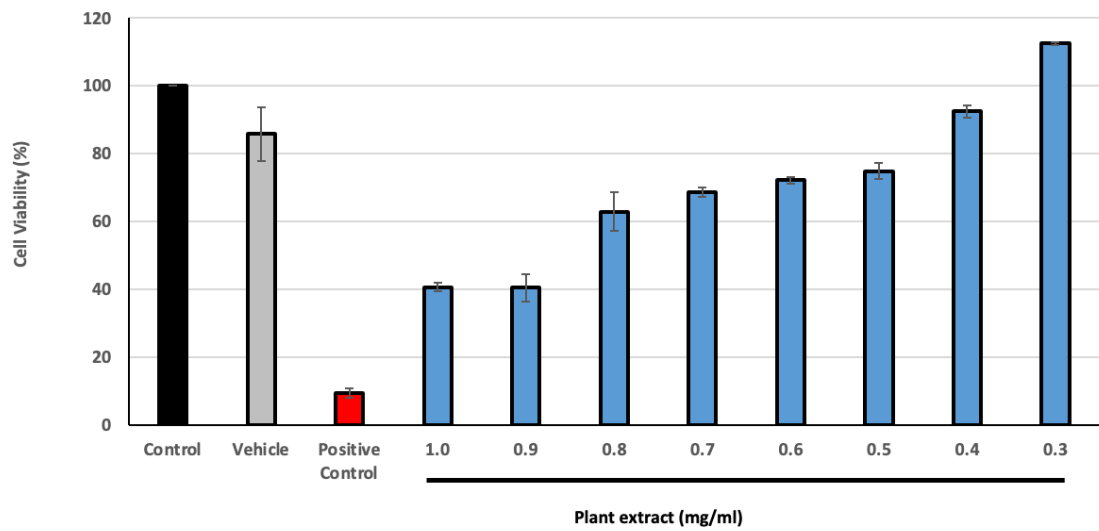

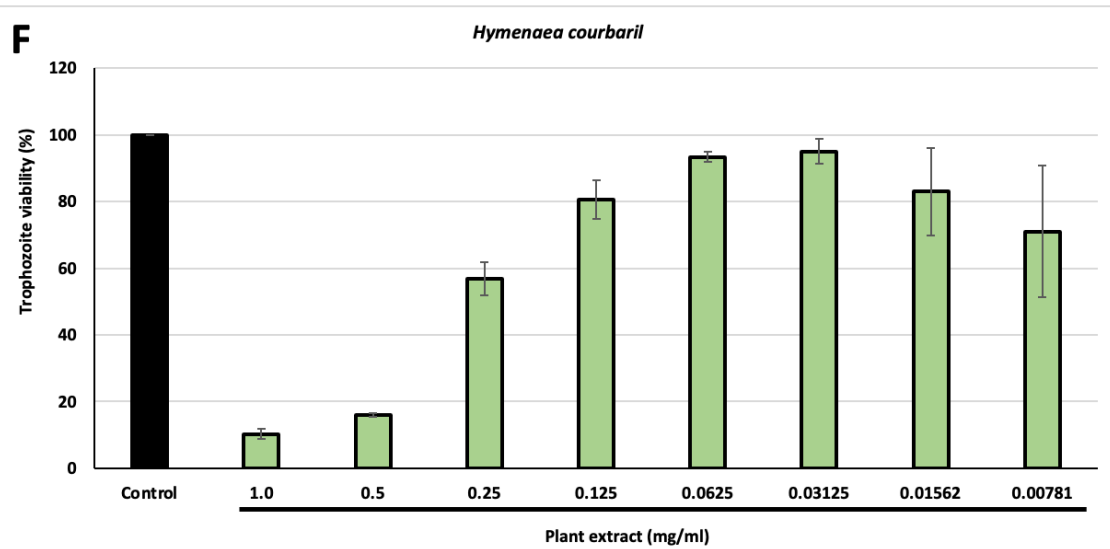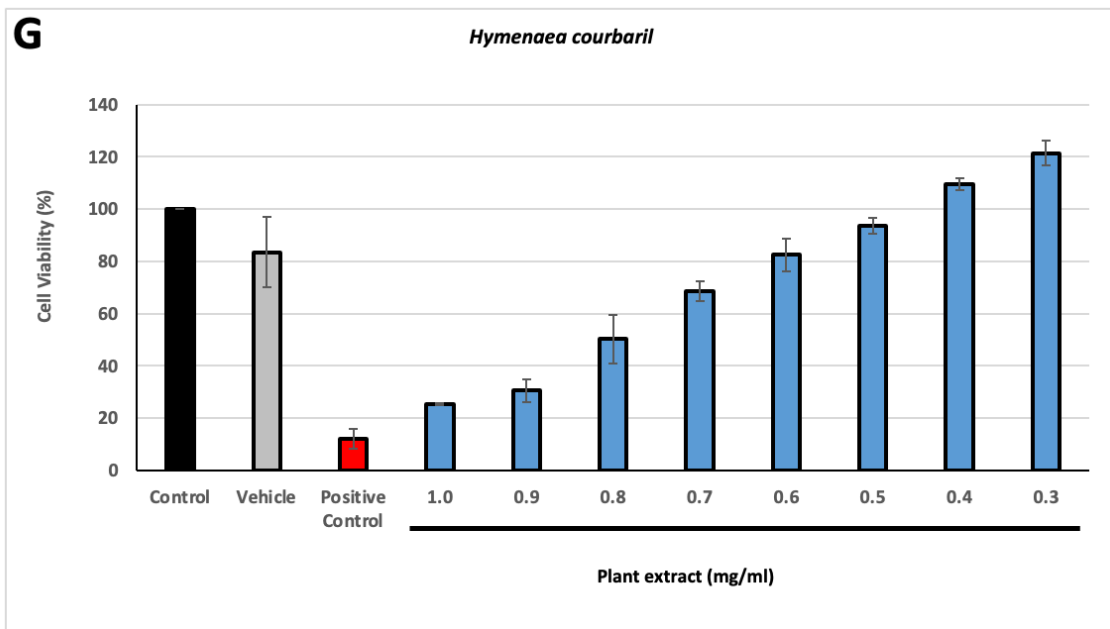

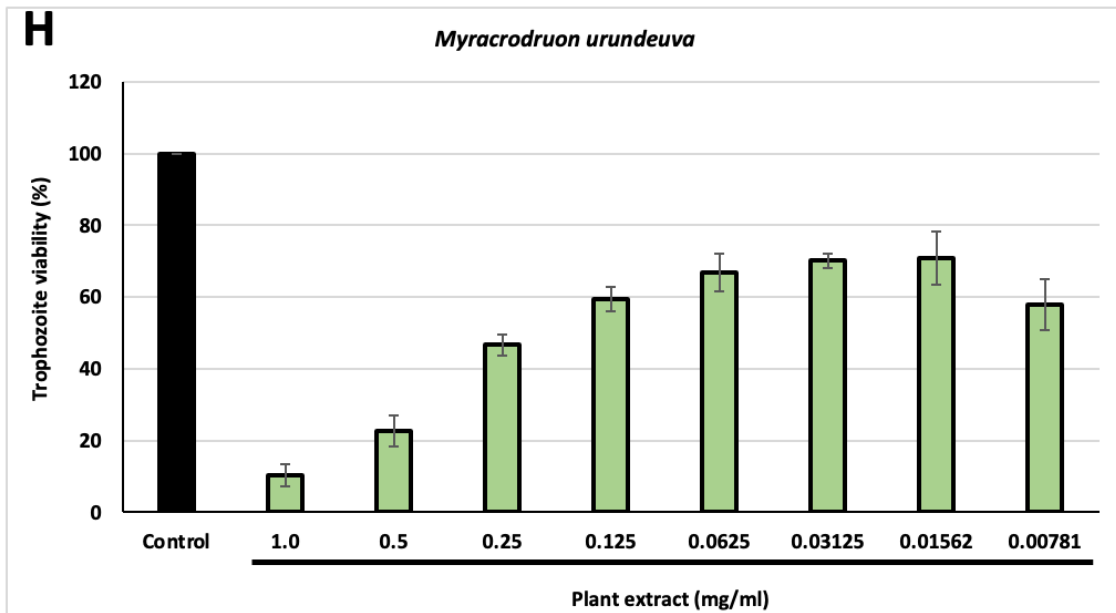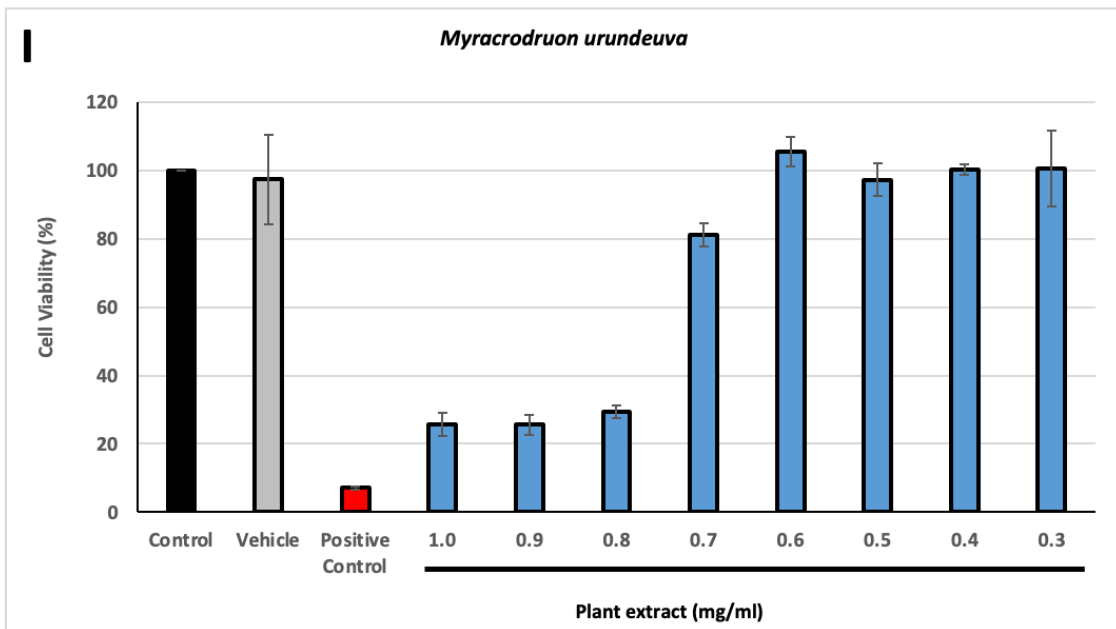

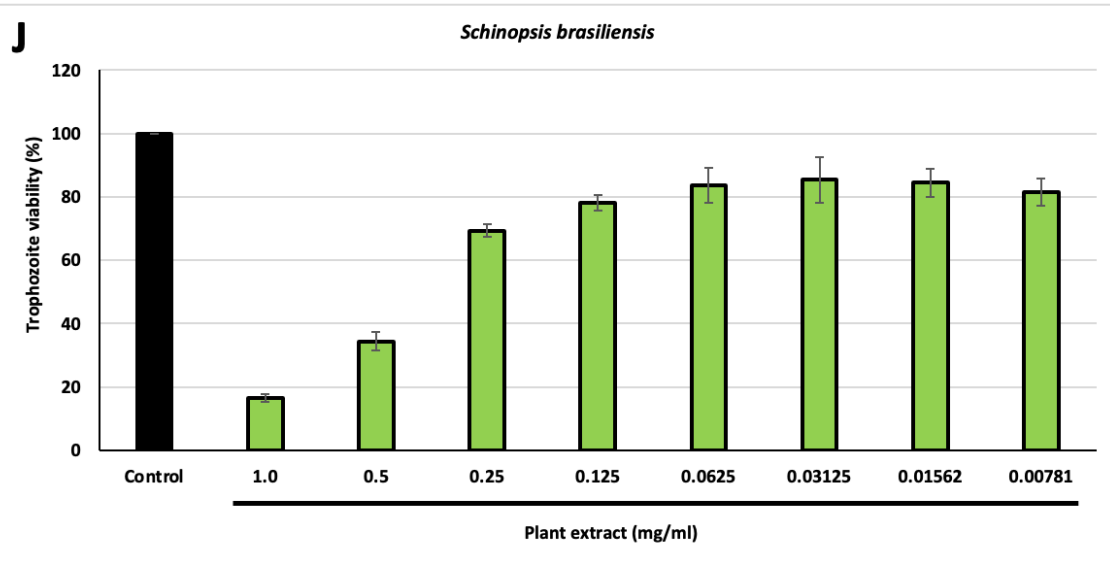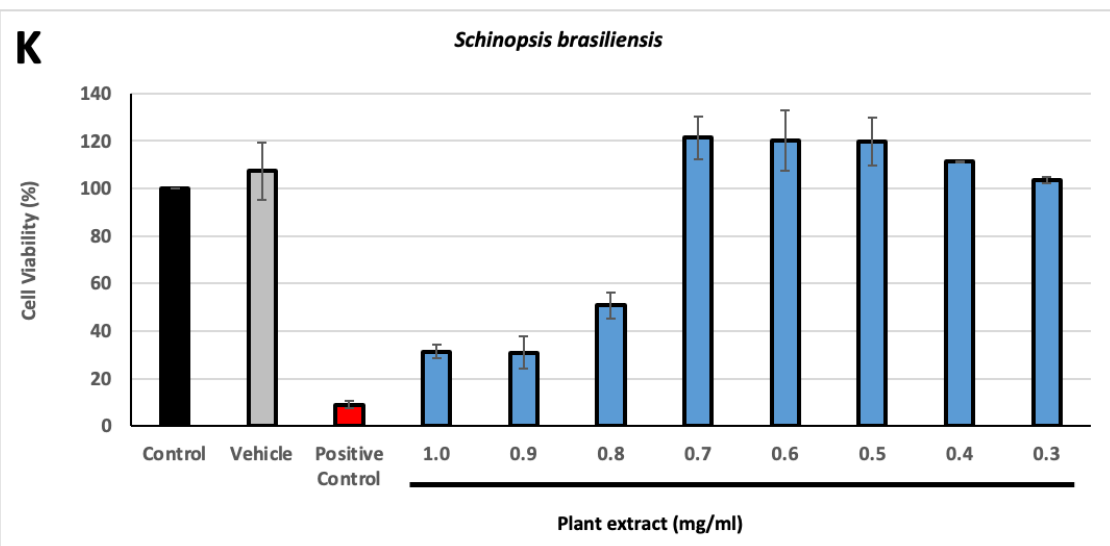

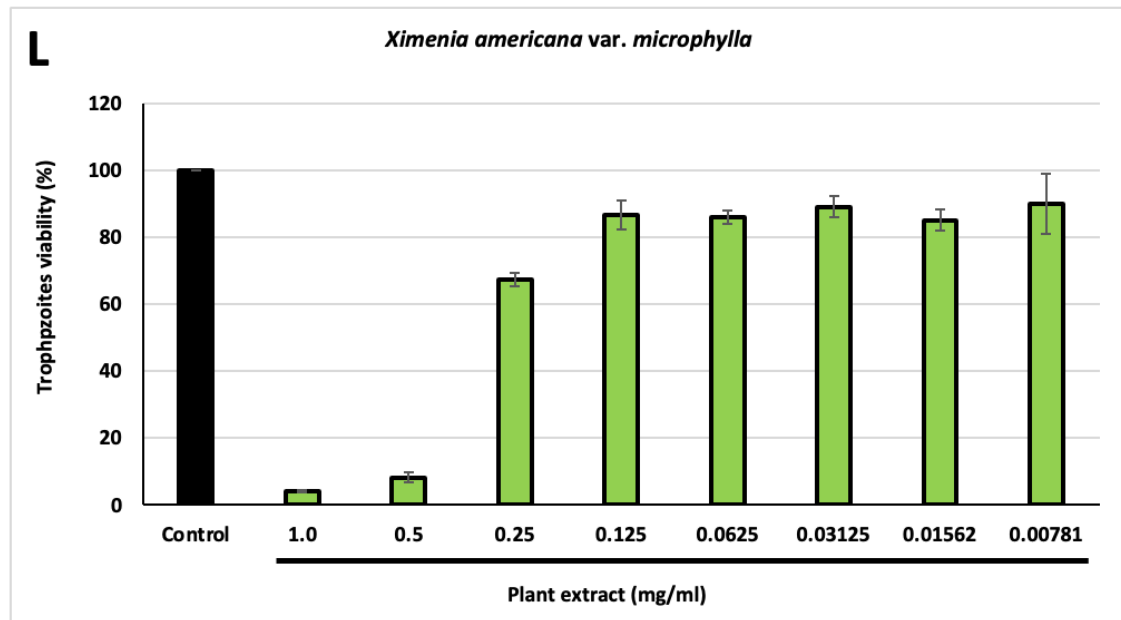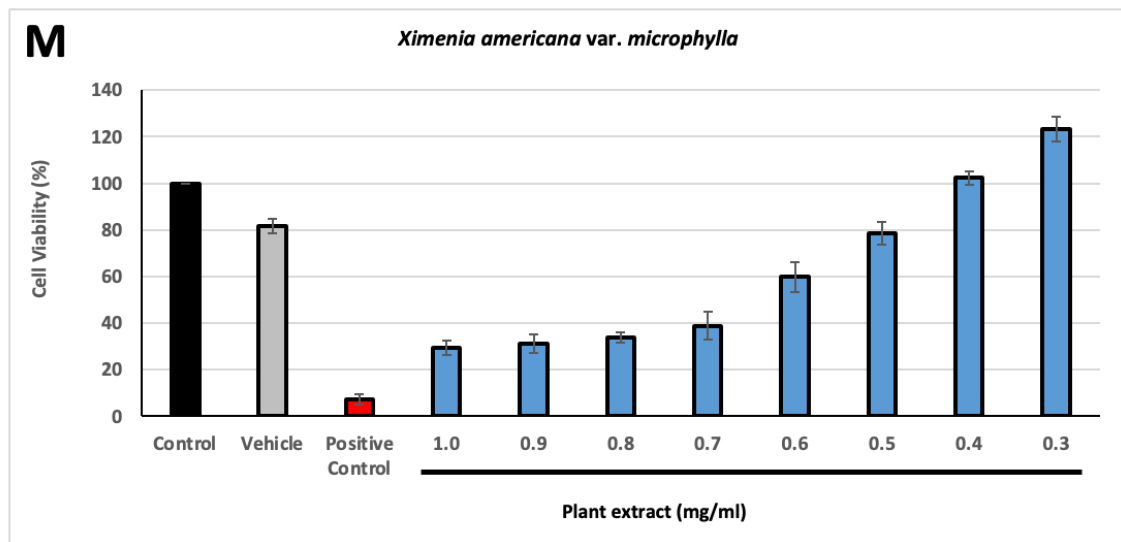

**Figure S1.** Determination of IC<sub>50</sub> values for anti-*Tritrichomonas foetus* activity (graphs B, D, F, H, J, L), except for *Cedrela* spp., which extract had IC<sub>50</sub> values determined for anti-*Trichomonas vaginalis* and anti-*Tritrichomonas foetus* activities (graphs A and B, respectively). The *T. vaginalis* ATCC 30236 isolate, and *T. foetus* TFK isolate were cultured in TYM medium (trypticase-yeast extract-maltose) pH 6.0 and 7.2, respectively, supplemented with 10% inactivated bovine serum. The screening was performed in 96-well microplates, the plant extracts concentration used was 1.0 mg/mL and the trophozoites were added at final density of  $2.0 \times 10^5$ /mL, maintained at 37 °C for 24 h in 5% CO<sub>2</sub>. Two controls were conducted: parasites only and metronidazole (100 µM or 0.0171 mg/ml). The activity was determined by assessing the motility and morphology of parasites compared with the negative control by counting in hemocytometer using trypan

blue dye exclusion (0.2%, v/v). Viability was determined as the percentage of viable trophozoites compared to the negative control (100% viability). The active extracts in the screening assay had the half maximal inhibitory concentration ( $IC_{50}$ ) value determined with concentrations ranging from 1.0 to 0.0078 mg/mL, by serial dilution. Graphs C, E, G, I, K, M show the cytotoxicity of plants extracts tested against human vaginal epithelial cells (HMEC line) cultured in RPMI-1640 medium, supplemented with 10% fetal bovine serum and 25  $\mu$ g/mL penicillin at 37 °C and 5%  $CO_2$ . Briefly,  $1.5 \times 10^4$  cells per well at fifteenth passage were seeded in 96-well microplates for 48 h; the medium was replaced with fresh medium containing or not (control condition) active extracts at  $IC_{50}$  concentration range (1.0 - 0.3 mg/ml). Triton X-100 0.2% was used as a positive control. The plates were incubated for 48 h. After this time, a solution of 3-(4,5-dimethylthiazol-2-yl)-2,5-diphenyltetrazolium bromide (MTT) (0.5 mg/mL) was added and incubated for 1 h at 37 °C. MTT was removed and the insoluble purple formazan was dissolved in dimethyl sulfoxide (DMSO). The amount of reduced MTT was measured at 570 nm. Graphs show  $CC_{50}$  estimate using GraphPadPrism6 software through a non-linear regression model. Bars represent cell viability as mean  $\pm$  standard deviation obtained by MTT assay.
